# Supplementary material
Source: PubMed Central journal article supplement (PMC3014370)
Supplement: mmc1.pdf [file mmc1.pdf]

## Supplemental Data

### Targeted High-Throughput Sequencing Identifies Mutations

#### in *atlastin-1* as a Cause of Hereditary Sensory Neuropathy Type I

Christian Guelly, Peng-Peng Zhu, Lea Leonardis, Lea Papić, Janez Zidar, Maria Schabhüttl, Heimo Strohmaier, Joachim Weis, Tim M. Strom, Jonathan Baets, Jan Willems, Peter De Jonghe, Mary M. Reilly, Eleonore Fröhlich, Martina Hatz, Slave Trajanoski, Thomas R. Pieber, Andreas R. Janecke, Craig Blackstone, and Michaela Auer-Grumbach

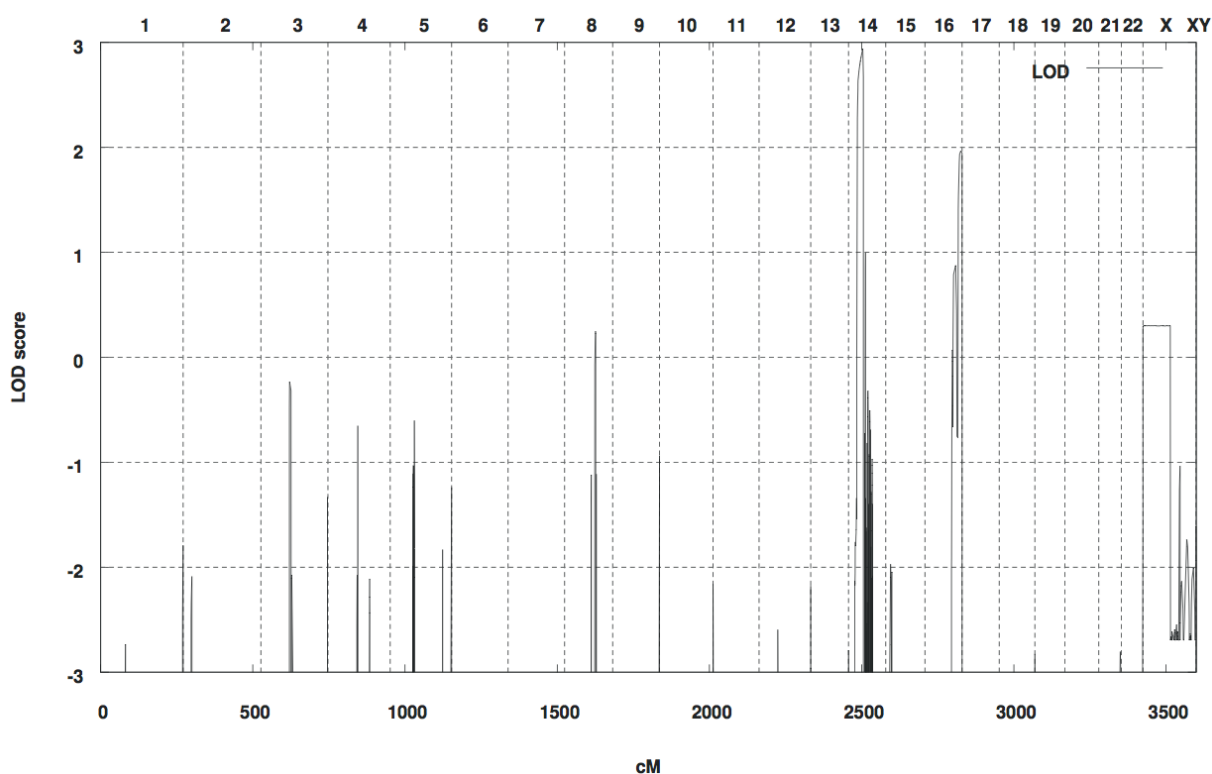

**Figure S1. Mapping a HSN 1 locus.**

The graph represents a parametric LOD score on the y axis in relation to genetic position on the x axis. Human chromosomes are concatenated from p-ter (left) to q-ter (right) on the x axis, and the genetic distance is given in cM. This scan identified a single region on chromosome 14 segregating with the disease based on the hypothesis of autosomal dominant inheritance and 100 % penetrance of the mutation.

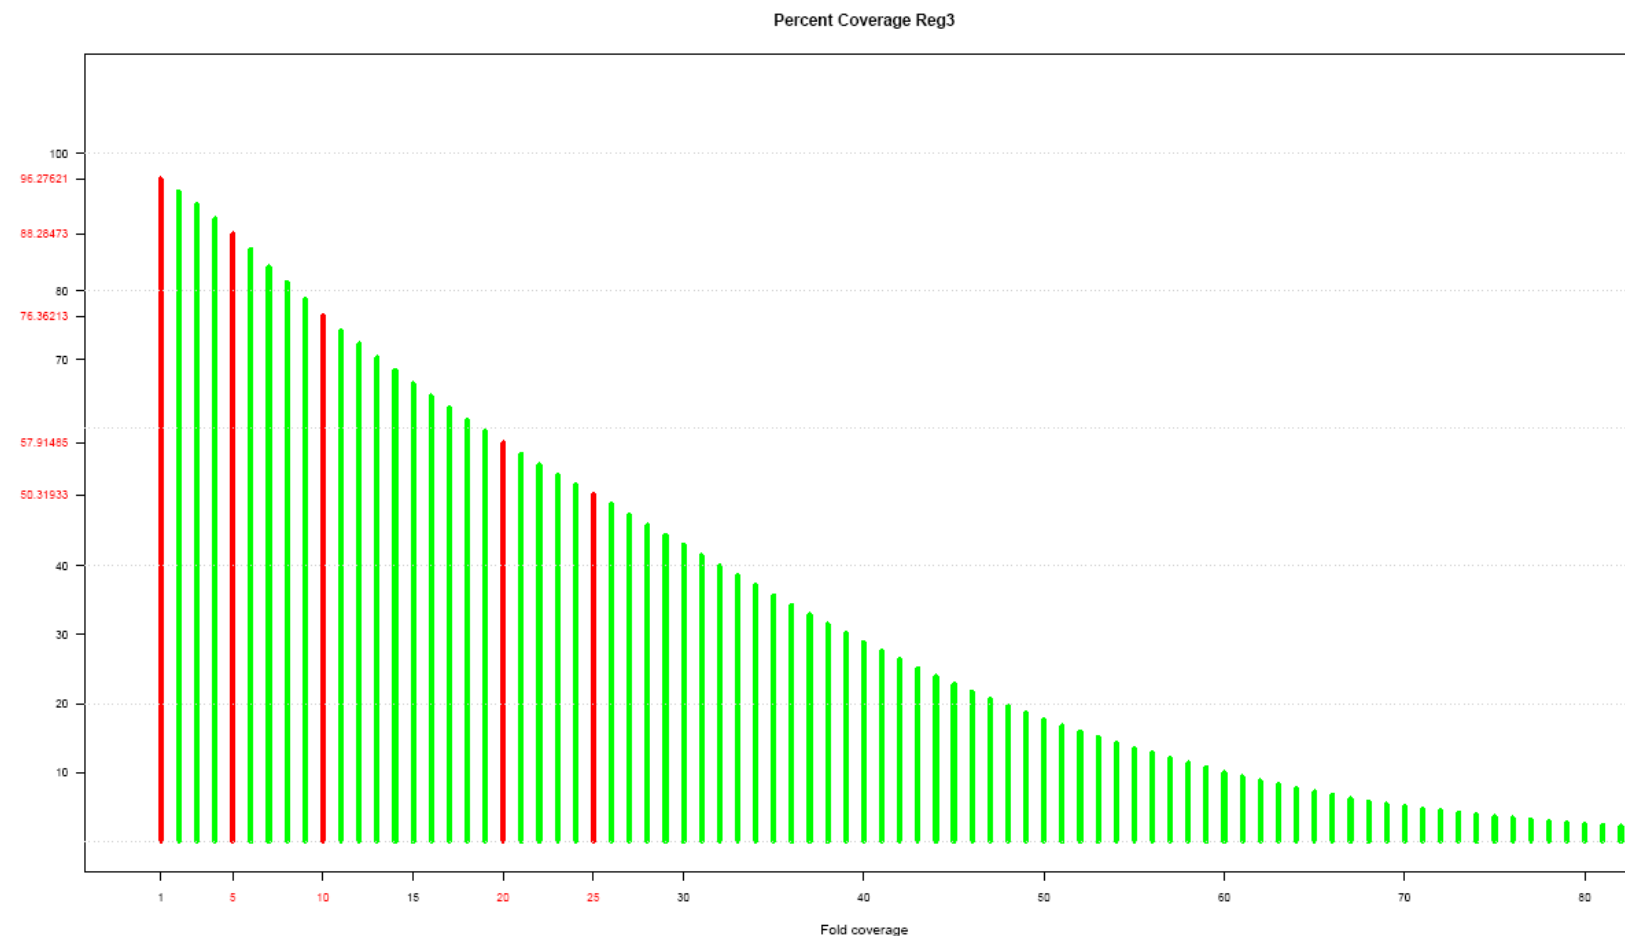

**Figure S2. Sequence coverage of the disease linked interval (chr.14: bp 41,334,596- 55,611,787).**

Captured DNA was sequenced to a calculated average depth of 30-fold. De-facto coverage (observed) was determined at the per nucleotide level. The x-axis indicates the calculated coverage per target nucleotide and the y-axis represents the percentage of sequenced target nucleotides. Red bars highlight the observed sequencing depth of 25-, 20-, 10-, 5- and 1-fold. 76.36% of the target nucleotides were sequenced to a minimum depth of 10-fold.

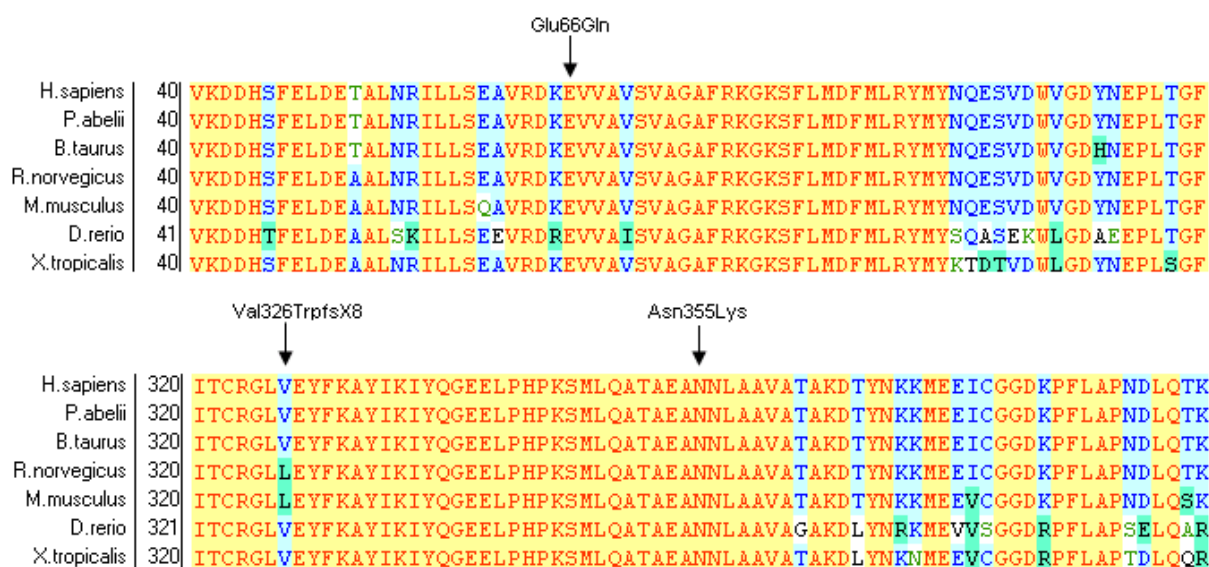

**Figure S3. Evolutionary conservation of the atlastin-1 protein.**

The atlastin-1 amino acid sequence was compared to its orthologues and paralogues with VectorNTI software. *H. sapiens* (NP\_056999.2), *P. abelii* (orangutan; NP\_001126926.1), *B. taurus* (bovine; NP\_001029803.1), *R. norvegicus* (NP\_001009831.1.), *M. musculus* (NP\_848743.1), *D. rerio* (zebrafish; NP\_001139172.1), *X. tropicalis* (frog; NP\_001072222.1). The arrows indicate mutation sites found in exons 2, 9 and 11. Amino acid residues numbers are at the left.

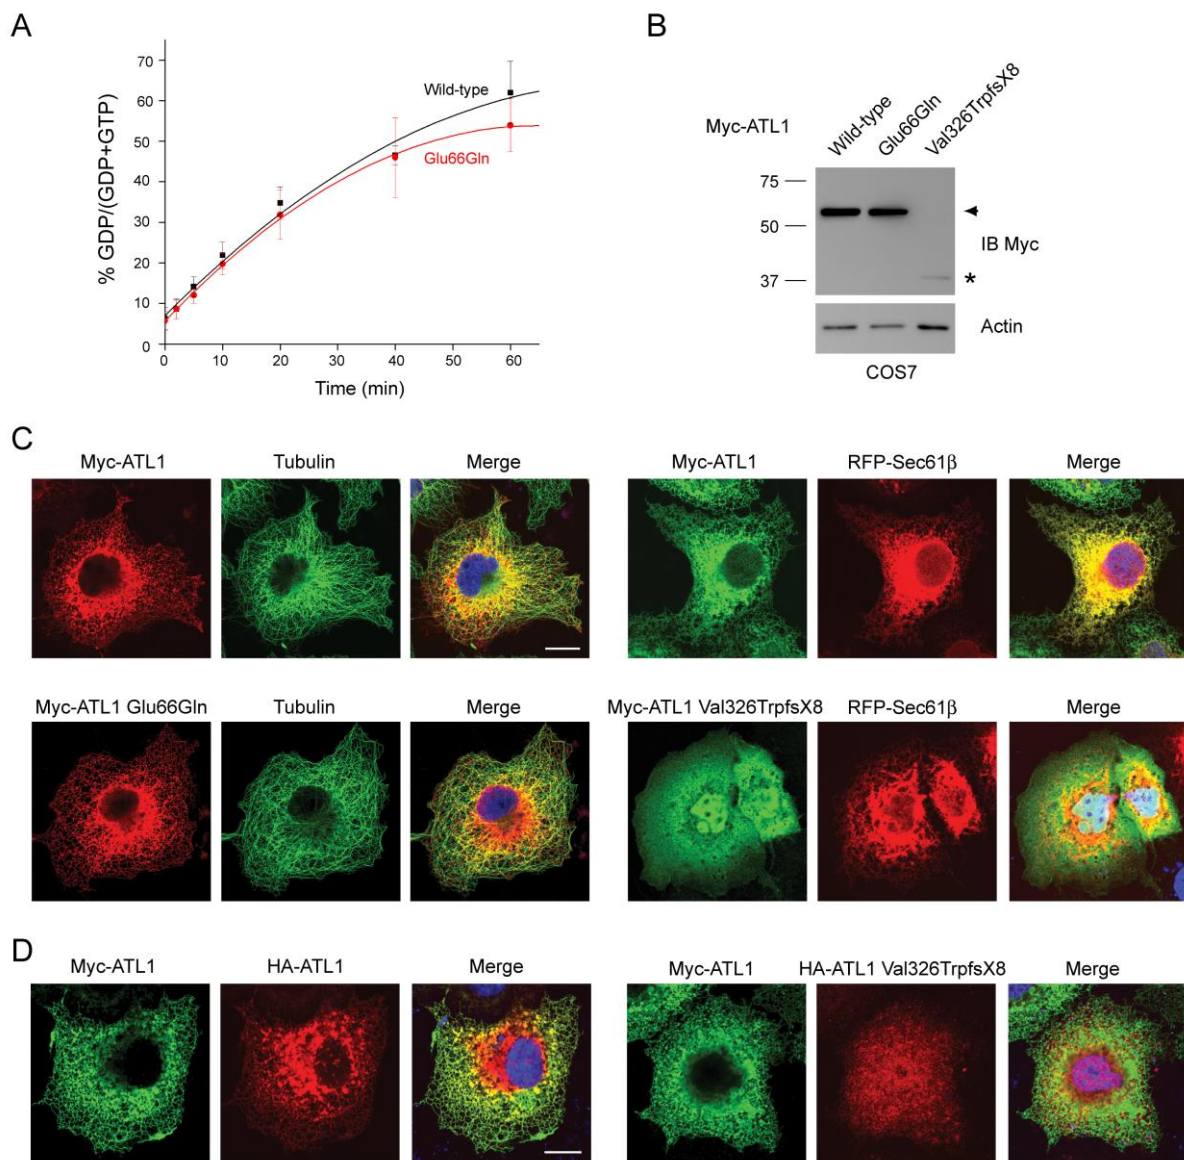

**Figure S4. ER morphology upon overexpression of the Glu66Gln and the Val326TrpfsX8 atlastin-1 mutants**

Neither Glu66Gln atlastin-1 nor Val326TrpfsX8 atlastin-1 disrupt ER morphology upon overexpression.

**(A)** Wild-type or Glu66Gln atlastin-1 (ATL1) were immunopurified from COS7 cells, and GTP hydrolysis *in vitro* plotted as a function of time (means  $\pm$  SD).

**(B)** COS7 cells transfected with Myc-tagged wild-type, Glu66Gln (arrowhead) or Val326TrpfsX8 atlastin-1 (asterisk) were immunoblotted (IB) for Myc-epitope. Actin levels were monitored as a control for protein loading. Migrations of molecular mass standards are at the left.

**(C)** COS7 cells were transfected with Myc-tagged wild-type or Glu66Gln atlastin-1 (left panels) and immunostained for Myc-epitope (red) and  $\beta$ -tubulin (green). Myc-tagged wild-type atlastin-1 and Val326TrpfsX8 atlastin-1 were co-transfected with the ER marker RFP-Sec61 $\beta$  (red; right panels) and immunostained for Myc-epitope (green). Merged images are at the right of each panel set with DAPI nuclear staining (blue) included.

**(D)** COS7 cells were co-transfected with Myc-tagged wild-type and either HA-tagged wild-type atlastin-1 (left panels) or Val326TrpfsX8 atlastin-1 (right panels) and immunostained for Myc-epitope (green) and HA-epitope (red). Merged images are at the right, with DAPI nuclear staining included. Bars, 20  $\mu$ m.

| #  | Ensembl Gene ID | Chr. Name | Gene Start (bp) | Gene End (bp) | Strand | Associated Gene Name | Associated Gene DB    | Description                                                                                                                                                                                                                                                                                                             | Gene Biotype   |
|----|-----------------|-----------|-----------------|---------------|--------|----------------------|-----------------------|-------------------------------------------------------------------------------------------------------------------------------------------------------------------------------------------------------------------------------------------------------------------------------------------------------------------------|----------------|
| 1  | ENSG00000165379 | 14        | 41146523        | 41443498      | 1      | LRFN5                | HGNC (curated)        | Leucine-rich repeat and fibronectin type-III domain-containing protein 5 Precursor [Source:UniProtKB/Swiss-Prot;Acc:Q96N16]                                                                                                                                                                                             | protein_coding |
| 2  | ENSG00000189139 | 14        | 44043295        | 44046232      | -1     | C14orf155            | HGNC (curated)        | Fibrous sheath CABYR-binding protein [Source:UniProtKB/Swiss-Prot;Acc:Q5H9T9]                                                                                                                                                                                                                                           | protein_coding |
| 3  | ENSG00000179476 | 14        | 44436257        | 44446210      | 1      | C14orf28             | HGNC (automatic)      | Uncharacterized protein C14orf28 (Dopamine receptor-interacting protein 1) [Source:UniProtKB/Swiss-Prot;Acc:Q4W4Y0]                                                                                                                                                                                                     | protein_coding |
| 4  | ENSG00000179454 | 14        | 44463298        | 44500929      | -1     | KLHL28               | HGNC (curated)        | Kelch-like protein 28 (BTB/POZ domain-containing protein 5) [Source:UniProtKB/Swiss-Prot;Acc:Q9NXS3]                                                                                                                                                                                                                    | protein_coding |
| 5  | ENSG00000198718 | 14        | 44501166        | 44613384      | 1      | FAM179B              | HGNC (curated)        | Protein FAM179B [Source:UniProtKB/Swiss-Prot;Acc:Q9Y4F4]                                                                                                                                                                                                                                                                | protein_coding |
| 6  | ENSG00000185246 | 14        | 44623080        | 44654554      | 1      | PRPF39               | HGNC (curated)        | Pre-mRNA-processing factor 39 (PRP39 homolog) [Source:UniProtKB/Swiss-Prot;Acc:Q86UA1]                                                                                                                                                                                                                                  | protein_coding |
| 7  | ENSG00000214921 | 14        | 44638408        | 44640897      | 1      | AL121809.6-1         | Clone-based (Ensembl) | Putative uncharacterized protein ENSP00000382190 Fragment [Source:UniProtKB/TrEMBL;Acc:A8MX11]                                                                                                                                                                                                                          | protein_coding |
| 8  | ENSG00000100442 | 14        | 44654856        | 44674272      | -1     | FKBP3                | HGNC (curated)        | FK506-binding protein 3 (EC 5.2.1.8)(Peptidyl-prolyl cis-trans isomerase)(PPlase)(Rotamase)(25 kDa FKBP)(FKBP-25)(Rapamycin-selective 25 kDa immunophilin) [Source:UniProtKB/Swiss-Prot;Acc:Q00688]                                                                                                                     | protein_coding |
| 9  | ENSG00000214919 | 14        | 44665321        | 44670589      | -1     | AL121809.6-2         | Clone-based (Ensembl) | Putative uncharacterized protein ENSP00000382186 Fragment [Source:UniProtKB/TrEMBL;Acc:A8MU49]                                                                                                                                                                                                                          | protein_coding |
| 10 | ENSG00000187790 | 14        | 44674900        | 44739835      | 1      | FANCM                | HGNC (automatic)      | Fanconi anemia group M protein (Protein FACM)(EC 3.6.1.-)(ATP-dependent RNA helicase FANCM)(Fanconi anemia-associated polypeptide of 250 kDa)(FAAP250)(Protein Hef ortholog) [Source:UniProtKB/Swiss-Prot;Acc:Q81YD8]                                                                                                   | protein_coding |
| 11 | ENSG00000129534 | 14        | 44742144        | 44792146      | -1     | C14orf106            | HGNC (curated)        | Mis18-binding protein 1 (P243) [Source:UniProtKB/Swiss-Prot;Acc:Q6P0N0]                                                                                                                                                                                                                                                 | protein_coding |
| 12 | ENSG00000165496 | 14        | 46190045        | 46190689      | -1     | RPL10L               | HGNC (automatic)      | 60S ribosomal protein L10-like [Source:UniProtKB/Swiss-Prot;Acc:Q96L21]                                                                                                                                                                                                                                                 | protein_coding |
| 13 | ENSG00000139915 | 14        | 46379045        | 47213703      | -1     | MDGA2                | HGNC (curated)        | MAM domain-containing glycosylphosphatidylinositol anchor protein 2 Precursor (MAM domain-containing protein 1) [Source:UniProtKB/Swiss-Prot;Acc:Q7Z553]                                                                                                                                                                | protein_coding |
| 14 | ENSG00000213741 | 14        | 49113809        | 49122844      | -1     | RPS29                | HGNC (curated)        | 40S ribosomal protein S29 [Source:UniProtKB/Swiss-Prot;Acc:P62273]                                                                                                                                                                                                                                                      | protein_coding |
| 15 | ENSG00000125385 | 14        | 49113809        | 49122844      | -1     | AL139099.3-2         | Clone-based (Ensembl) | Putative uncharacterized protein ENSP00000346229 [Source:UniProtKB/TrEMBL;Acc:A6NBZ9]                                                                                                                                                                                                                                   | protein_coding |
| 16 | ENSG00000165501 | 14        | 49135165        | 49151705      | 1      | PPIL5                | HGNC (curated)        | Peptidylprolyl isomerase-like 5 (LRR-repeat protein 1)(LRR-1)(4-1BB-mediated-signaling molecule)(4-1BBlr) [Source:UniProtKB/Swiss-Prot;Acc:Q96L50]                                                                                                                                                                      | protein_coding |
| 17 | ENSG00000165502 | 14        | 49155159        | 49157099      | -1     | RPL36AL              | HGNC (curated)        | 60S ribosomal protein L36a-like [Source:UniProtKB/Swiss-Prot;Acc:Q969Q0]                                                                                                                                                                                                                                                | protein_coding |
| 18 | ENSG00000168282 | 14        | 49157239        | 49159948      | 1      | MGAT2                | HGNC (curated)        | Alpha-1,6-mannosyl-glycoprotein 2-beta-N-acetylglucosaminyltransferase (EC 2.4.1.143)(Mannoside acetylglucosaminyltransferase 2)(N-glycosyl-oligosaccharide-glycoprotein N-acetylglucosaminyltransferase II)(Beta-1,2-N-acetylglucosaminyltransferase II)(GlcNAc-T II)(GNT-II) [Source:UniProtKB/Swiss-Prot;Acc:Q10469] | protein_coding |
| 19 | ENSG00000165506 | 14        | 49161642        | 49171698      | -1     | C14orf104            | HGNC (curated)        | Protein kintoun [Source:UniProtKB/Swiss-Prot;Acc:Q9NVR5]                                                                                                                                                                                                                                                                | protein_coding |
| 20 | ENSG00000100479 | 14        | 49180028        | 49224685      | -1     | POLE2                | HGNC (automatic)      | DNA polymerase epsilon subunit 2 (DNA polymerase II subunit 2)(EC 2.7.7.7)(DNA polymerase epsilon subunit B) [Source:UniProtKB/Swiss-Prot;Acc:P56282]                                                                                                                                                                   | protein_coding |
| 21 | ENSG00000197776 | 14        | 49229610        | 49289610      | 1      | KLHDC1               | HGNC (curated)        | Kelch domain-containing protein 1 [Source:UniProtKB/Swiss-Prot;Acc:Q8N7A1]                                                                                                                                                                                                                                              | protein_coding |
| 22 | ENSG00000165516 | 14        | 49304537        | 49319606      | 1      | KLHDC2               | HGNC (curated)        | Kelch domain-containing protein 2 (Hepatocellular carcinoma-associated antigen 33)(Host cell factor homolog LCP)(Host cell factor-like protein 1)(HCLP-1) [Source:UniProtKB/Swiss-Prot;Acc:Q9Y2U9]                                                                                                                      | protein_coding |
| 23 | ENSG00000165525 | 14        | 49320282        | 49389289      | -1     | SDCCAG1              | HGNC (curated)        | Serologically defined colon cancer antigen 1 (Antigen NY-CO-1) [Source:UniProtKB/Swiss-Prot;Acc:Q60524]                                                                                                                                                                                                                 | protein_coding |
| 24 | ENSG00000197502 | 14        | 49370560        | 49381302      | -1     | AL627171.1-1         | Clone-based (Ensembl) | Putative uncharacterized protein ENSP00000351653 Fragment [Source:UniProtKB/TrEMBL;Acc:A6NP80]                                                                                                                                                                                                                          | protein_coding |
| 25 | ENSG00000165527 | 14        | 49429486        | 49433522      | 1      | ARF6                 | HGNC (curated)        | ADP-ribosylation factor 6 [Source:UniProtKB/Swiss-Prot;Acc:P62330]                                                                                                                                                                                                                                                      | protein_coding |

**Table S1. List of sequence-capture protein-encoding target genes (n=75) located within the linkage region (chr14: bp41,334,596 – 55,611,787).**

| #  | Ensembl Gene ID | Chr. Name | Gene Start (bp) | Gene End (bp) | Strand | Associated Gene Name | Associated Gene DB    | Description                                                                                                                                                                                                         | Gene Biotype   |
|----|-----------------|-----------|-----------------|---------------|--------|----------------------|-----------------------|---------------------------------------------------------------------------------------------------------------------------------------------------------------------------------------------------------------------|----------------|
| 26 | ENSG00000214900 | 14        | 49518180        | 49543988      | -1     | C14orf182            | HGNC (automatic)      | hypothetical protein LOC283551 [Source:RefSeq peptide;Acc:NP_001012724]                                                                                                                                             | protein_coding |
| 27 | ENSG00000175860 | 14        | 49529233        | 49542987      | -1     | AL117692.5           | Clone-based (Ensembl) | Putative uncharacterized protein ENSP00000313396 Fragment [Source:UniProtKB/TrEMBL;Acc:A6NHK8]                                                                                                                      | protein_coding |
| 28 | ENSG00000168260 | 14        | 49620119        | 49629111      | -1     | AL109758.3-1         | Clone-based (Ensembl) | hypothetical protein LOC196913 [Source:RefSeq peptide;Acc:NP_001014830]                                                                                                                                             | protein_coding |
| 29 | ENSG00000100483 | 14        | 49645092        | 49653047      | -1     | C14orf138            | HGNC (curated)        | Uncharacterized protein C14orf138 [Source:UniProtKB/Swiss-Prot;Acc:Q9H867]                                                                                                                                          | protein_coding |
| 30 | ENSG00000100485 | 14        | 49653596        | 49767849      | -1     | SOS2                 | HGNC (curated)        | Son of sevenless homolog 2 (SOS-2) [Source:UniProtKB/Swiss-Prot;Acc:Q07890]                                                                                                                                         | protein_coding |
| 31 | ENSG00000087299 | 14        | 49774064        | 49848697      | -1     | L2HGDH               | HGNC (curated)        | L-2-hydroxyglutarate dehydrogenase, mitochondrial Precursor (Duranin)(EC 1.1.99.2) [Source:UniProtKB/Swiss-Prot;Acc:Q9H9P8]                                                                                         | protein_coding |
| 32 | ENSG00000125375 | 14        | 49848797        | 49872026      | 1      | ATP5S                | HGNC (automatic)      | ATP synthase subunit s, mitochondrial Precursor (ATP synthase-coupling factor B)(Mitochondrial ATP synthase regulatory component factor B) [Source:UniProtKB/Swiss-Prot;Acc:Q99766]                                 | protein_coding |
| 33 | ENSG00000100490 | 14        | 49866060        | 49952929      | -1     | CDKL1                | HGNC (curated)        | Cyclin-dependent kinase-like 1 (EC 2.7.11.22)(Serine/threonine-protein kinase KKIALRE)(Protein kinase p42 KKIALRE) [Source:UniProtKB/Swiss-Prot;Acc:Q00532]                                                         | protein_coding |
| 34 | ENSG00000012983 | 14        | 49954999        | 50069126      | -1     | MAP4K5               | HGNC (automatic)      | Mitogen-activated protein kinase kinase kinase kinase 5 (EC 2.7.11.1)(MAPK/ERK kinase kinase kinase 5)(MEK kinase kinase 5)(MEKKK 5)(Kinase homologous to SPS1/STE20)(KHS) [Source:UniProtKB/Swiss-Prot;Acc:Q9Y4K4] | protein_coding |
| 35 | ENSG00000198513 | 14        | 50096580        | 50169508      | 1      | SPG3A                | HGNC (curated)        | Atlastin-1 (Guanine nucleotide-binding protein 3)(GTP-binding protein 3)(GBP-3)(Brain-specific GTP-binding protein) [Source:UniProtKB/Swiss-Prot;Acc:Q8WXF7]                                                        | protein_coding |
| 36 | ENSG00000151748 | 14        | 50170110        | 50204773      | -1     | SAV1                 | HGNC (curated)        | Protein salvador homolog 1 (45 kDa WW domain protein)(hWW45) [Source:UniProtKB/Swiss-Prot;Acc:Q9H4B6]                                                                                                               | protein_coding |
| 37 | ENSG00000100503 | 14        | 50256231        | 50367597      | -1     | NIN                  | HGNC (curated)        | Ninein (hNinein)(Glycogen synthase kinase 3 beta-interacting protein)(GSK3B-interacting protein) [Source:UniProtKB/Swiss-Prot;Acc:Q8N4C6]                                                                           | protein_coding |
| 38 | ENSG00000131969 | 14        | 50402270        | 50441438      | 1      | C14orf29             | HGNC (curated)        | Abhydrolase domain-containing protein 12B [Source:UniProtKB/Swiss-Prot;Acc:Q7Z5M8]                                                                                                                                  | protein_coding |
| 39 | ENSG00000100504 | 14        | 50441687        | 50480984      | -1     | PYGL                 | HGNC (automatic)      | Glycogen phosphorylase, liver form (EC 2.4.1.1) [Source:UniProtKB/Swiss-Prot;Acc:P06737]                                                                                                                            | protein_coding |
| 40 | ENSG00000100505 | 14        | 50511738        | 50632529      | -1     | TRIM9                | HGNC (curated)        | Tripartite motif-containing protein 9 (RING finger protein 91) [Source:UniProtKB/Swiss-Prot;Acc:Q9C026]                                                                                                             | protein_coding |
| 41 | ENSG00000139921 | 14        | 50776740        | 50792506      | 1      | TMX1                 | HGNC (automatic)      | Thioredoxin domain-containing protein 1 Precursor (Transmembrane Trx-related protein)(Thioredoxin-related transmembrane protein) [Source:UniProtKB/Swiss-Prot;Acc:Q9H3N1]                                           | protein_coding |
| 42 | ENSG00000139926 | 14        | 51025605        | 51267192      | 1      | FRMD6                | HGNC (curated)        | FERM domain-containing protein 6 (Willin) [Source:UniProtKB/Swiss-Prot;Acc:Q96NE9]                                                                                                                                  | protein_coding |
| 43 | ENSG00000186469 | 14        | 51396800        | 51506267      | 1      | GNG2                 | HGNC (automatic)      | Guanine nucleotide-binding protein G(i)/G(s)/G(o) subunit gamma-2 Precursor (G gamma-l) [Source:UniProtKB/Swiss-Prot;Acc:P59768]                                                                                    | protein_coding |
| 44 | ENSG00000087302 | 14        | 51525943        | 51541164      | 1      | C14orf166            | HGNC (curated)        | UPF0568 protein C14orf166 [Source:UniProtKB/Swiss-Prot;Acc:Q9Y224]                                                                                                                                                  | protein_coding |
| 45 | ENSG00000087303 | 14        | 51541271        | 51606295      | -1     | NID2                 | HGNC (curated)        | Nidogen-2 Precursor (NID-2)(Osteonidogen) [Source:UniProtKB/Swiss-Prot;Acc:Q14112]                                                                                                                                  | protein_coding |
| 46 | ENSG00000168229 | 14        | 51804181        | 51813191      | 1      | PTGDR                | HGNC (curated)        | Prostaglandin D2 receptor (Prostanoid DP receptor)(PGD receptor) [Source:UniProtKB/Swiss-Prot;Acc:Q13258]                                                                                                           | protein_coding |
| 47 | ENSG00000125384 | 14        | 51850863        | 51865041      | 1      | PTGER2               | HGNC (curated)        | Prostaglandin E2 receptor EP2 subtype (Prostanoid EP2 receptor)(PGE receptor, EP2 subtype) [Source:UniProtKB/Swiss-Prot;Acc:P43116]                                                                                 | protein_coding |
| 48 | ENSG00000087301 | 14        | 51967059        | 52088974      | -1     | TXNDC16              | HGNC (automatic)      | Thioredoxin domain-containing protein 16 Precursor [Source:UniProtKB/Swiss-Prot;Acc:Q9P2K2]                                                                                                                         | protein_coding |
| 49 | ENSG00000180998 | 14        | 52089616        | 52174180      | 1      | GPR137C              | HGNC (automatic)      | Integral membrane protein GPR137C (Transmembrane 7 superfamily member 1-like 2 protein) [Source:UniProtKB/Swiss-Prot;Acc:Q8N3F9]                                                                                    | protein_coding |
| 50 | ENSG00000197930 | 14        | 52178357        | 52232182      | -1     | ERO1L                | HGNC (curated)        | ERO1-like protein alpha Precursor (ERO1-L)(EC 1.8.4.4)(Oxidoreductin-1-L)(Endoplasmic oxidoreductin-1-like protein) [Source:UniProtKB/Swiss-Prot;Acc:Q96HE7]                                                        | protein_coding |

**Table S1.** continued

| #  | Ensembl Gene ID | Chr. Name | Gene Start (bp) | Gene End (bp) | Strand | Associated Gene Name | Associated Gene DB    | Description                                                                                                                                                                                                                                                               | Gene Biotype   |
|----|-----------------|-----------|-----------------|---------------|--------|----------------------|-----------------------|---------------------------------------------------------------------------------------------------------------------------------------------------------------------------------------------------------------------------------------------------------------------------|----------------|
| 51 | ENSG00000100519 | 14        | 52243668        | 52264463      | 1      | PSMC6                | HGNC (curated)        | 26S protease regulatory subunit S10B (Proteasome 26S subunit ATPase 6)(Proteasome subunit p42) [Source:UniProtKB/Swiss-Prot;Acc:P62333]                                                                                                                                   | protein_coding |
| 52 | ENSG00000198252 | 14        | 52266675        | 52311409      | 1      | STYX                 | HGNC (curated)        | Serine/threonine/tyrosine-interacting protein (Protein tyrosine phosphatase-like protein) [Source:UniProtKB/Swiss-Prot;Acc:Q8WUJ0]                                                                                                                                        | protein_coding |
| 53 | ENSG00000100522 | 14        | 52311662        | 52328133      | -1     | GNPNAT1              | HGNC (curated)        | Glucosamine 6-phosphate N-acetyltransferase (EC 2.3.1.4)(Phosphoglucosamine transacetylase)(Phosphoglucosamine acetylase) [Source:UniProtKB/Swiss-Prot;Acc:Q96EK6]                                                                                                        | protein_coding |
| 54 | ENSG00000073712 | 14        | 52393736        | 52487460      | -1     | PLEKHC1              | HGNC (curated)        | Feritin family homolog 2 (Pleckstrin homology domain-containing family C member 1)(Kindlin-2)(Mitogen-inducible gene 2 protein)(MIG-2) [Source:UniProtKB/Swiss-Prot;Acc:Q96AC1]                                                                                           | protein_coding |
| 55 | ENSG00000214855 | 14        | 52479391        | 52483939      | -1     | AL352979.4           | Clone-based (Ensembl) | Putative uncharacterized protein ENSP00000382076 Fragment [Source:UniProtKB/TrEMBL;Acc:A8MVM4]                                                                                                                                                                            | protein_coding |
| 56 | ENSG00000100523 | 14        | 52580436        | 52689750      | -1     | DDHD1                | HGNC (curated)        | Phospholipase DDHD1 (EC 3.1.1.-)(DDHD domain-containing protein 1)(Phosphatidic acid-prefering phospholipase A1 homolog)(PA-PLA1) [Source:UniProtKB/Swiss-Prot;Acc:Q8NEL9]                                                                                                | protein_coding |
| 57 | ENSG00000125378 | 14        | 53486204        | 53493279      | -1     | BMP4                 | HGNC (curated)        | Bone morphogenetic protein 4 Precursor (BMP-4)(BMP-2B) [Source:UniProtKB/Swiss-Prot;Acc:P12644]                                                                                                                                                                           | protein_coding |
| 58 | ENSG00000100526 | 14        | 53933476        | 53956682      | 1      | CDKN3                | HGNC (curated)        | Cyclin-dependent kinase inhibitor 3 (EC 3.1.3.48)(EC 3.1.3.16)(CDK2-associated dual-specificity phosphatase)(Kinase-associated phosphatase)(Cyclin-dependent kinase-interacting protein 2)(Cyclin-dependent kinase interactor 1) [Source:UniProtKB/Swiss-Prot;Acc:Q16667] | protein_coding |
| 59 | ENSG00000214854 | 14        | 53938646        | 53968772      | -1     | AL049778.3           | Clone-based (Ensembl) |                                                                                                                                                                                                                                                                           | protein_coding |
| 60 | ENSG00000100528 | 14        | 53956590        | 53977898      | -1     | CNIH                 | HGNC (curated)        | Protein cornichon homolog (T-cell growth-associated molecule 77)(TGAM77) [Source:UniProtKB/Swiss-Prot;Acc:Q95406]                                                                                                                                                         | protein_coding |
| 61 | ENSG00000197045 | 14        | 54010959        | 54025494      | -1     | GMFB                 | HGNC (curated)        | Glia maturation factor beta (GMF-beta) [Source:UniProtKB/Swiss-Prot;Acc:P60983]                                                                                                                                                                                           | protein_coding |
| 62 | ENSG00000100532 | 14        | 54046310        | 54075317      | 1      | CGRRF1               | HGNC (curated)        | Cell growth regulator with RING finger domain protein 1 (Cell growth regulatory gene 19 protein)(RING finger protein 197) [Source:UniProtKB/Swiss-Prot;Acc:Q99675]                                                                                                        | protein_coding |
| 63 | ENSG00000020577 | 14        | 54104387        | 54325595      | 1      | SAMD4A               | HGNC (automatic)      | Sterile alpha motif domain-containing protein 4A [Source:UniProtKB/Swiss-Prot;Acc:Q9UUP9]                                                                                                                                                                                 | protein_coding |
| 64 | ENSG00000131979 | 14        | 54378476        | 54439292      | -1     | GCH1                 | HGNC (curated)        | GTP cyclohydrolase 1 (EC 3.5.4.16)(GTP cyclohydrolase I)(GTP-CH-I) [Source:UniProtKB/Swiss-Prot;Acc:P30793]                                                                                                                                                               | protein_coding |
| 65 | ENSG00000198554 | 14        | 54476692        | 54563557      | -1     | WDHD1                | HGNC (curated)        | WD repeat and HMG-box DNA-binding protein 1 (Acidic nucleoplasmic DNA-binding protein 1)(And-1) [Source:UniProtKB/Swiss-Prot;Acc:Q75177]                                                                                                                                  | protein_coding |
| 66 | ENSG00000180008 | 14        | 54563594        | 54585957      | 1      | SOCS4                | HGNC (curated)        | Suppressor of cytokine signaling 4 (SOCS-4)(Suppressor of cytokine signaling 7)(SOCS-7) [Source:UniProtKB/Swiss-Prot;Acc:Q8WXH5]                                                                                                                                          | protein_coding |
| 67 | ENSG00000168175 | 14        | 54588110        | 54606665      | 1      | MAPK1IP1L            | HGNC (automatic)      | MAPK-interacting and spindle-stabilizing protein-like (Mitogen-activated protein kinase 1-interacting protein 1-like) [Source:UniProtKB/Swiss-Prot;Acc:Q8NDCC]                                                                                                            | protein_coding |
| 68 | ENSG00000131981 | 14        | 54665574        | 54681874      | 1      | LGALS3               | HGNC (automatic)      | Galectin-3 (Galactose-specific lectin 3)(Mac-2 antigen)(IgE-binding protein)(35 kDa lectin)(Carbohydrate-binding protein 35)(CBP 35)(Laminin-binding protein)(Lectin L-29)(L-31)(Galactoside-binding protein)(GALBP) [Source:UniProtKB/Swiss-Prot;Acc:P17931]             | protein_coding |
| 69 | ENSG00000126787 | 14        | 54684601        | 54728149      | -1     | DLGAP5               | HGNC (curated)        | Disks large-associated protein 5 (DAP-5)(Disks large-associated protein DLG7)(Discs large homolog 7)(Hepatitis up-regulated protein)(HURP) [Source:UniProtKB/Swiss-Prot;Acc:Q15398]                                                                                       | protein_coding |
| 70 | ENSG00000178974 | 14        | 54807832        | 54890080      | 1      | FBXO34               | HGNC (automatic)      | F-box only protein 34 [Source:UniProtKB/Swiss-Prot;Acc:Q9NWN3]                                                                                                                                                                                                            | protein_coding |
| 71 | ENSG00000126775 | 14        | 54902863        | 54948329      | -1     | KIAA0831             | HGNC (automatic)      | Uncharacterized protein KIAA0831 [Source:UniProtKB/Swiss-Prot;Acc:Q6ZNE5]                                                                                                                                                                                                 | protein_coding |
| 72 | ENSG00000182521 | 14        | 54950733        | 54977074      | -1     | TBPL2                | HGNC (curated)        | TATA box-binding protein-like protein 2 (TBP-like protein 2)(TATA box-binding protein-related factor 3)(TBP-related factor 3) [Source:UniProtKB/Swiss-Prot;Acc:Q6SJ96]                                                                                                    | protein_coding |
| 73 | ENSG00000186615 | 14        | 55113662        | 55116581      | -1     | C14orf33             | HGNC (automatic)      | Putative uncharacterized protein C14orf33 [Source:UniProtKB/Swiss-Prot;Acc:Q86SY8]                                                                                                                                                                                        | protein_coding |
| 74 | ENSG00000126777 | 14        | 55116678        | 55221054      | 1      | KTN1                 | HGNC (curated)        | Kinetin (Kinesin receptor)(CG-1 antigen) [Source:UniProtKB/Swiss-Prot;Acc:Q86UP2]                                                                                                                                                                                         | protein_coding |
| 75 | ENSG00000177350 | 14        | 55302716        | 55304187      | 1      | AL355773.4           | Clone-based (Ensembl) | Putative 60S ribosomal protein L13a-like MGC87657 [Source:UniProtKB/Swiss-Prot;Acc:Q6NVV1]                                                                                                                                                                                | protein_coding |

**Table S1.** continued

| Reference<br>Accno | Start Pos | End Pos  | Ref<br>Nuc | Var<br>Nuc | Total<br>Depth | Var Freq | Ref<br>AA | Var<br>AA | Coding<br>Frame | Region<br>Name | Known<br>SNP's | AA variation   |
|--------------------|-----------|----------|------------|------------|----------------|----------|-----------|-----------|-----------------|----------------|----------------|----------------|
| chr14              | 50159662  | 50159662 | C          | A          | 32             | 37%      | N         | K         | 1               | ATL1           | 0/370          | non-synonymous |
| chr14              | 51851263  | 51851263 | T          | G          | 22             | 73%      | C         | G         | 1               | PTGER2         | 1/40 controls  | non-synonymous |
| chr14              | 44044716  | 44044716 | G          | A          | 41             | 41%      | P         | S         | -1              | FSCB           | rs1959379      | non-synonymous |
| chr14              | 44044802  | 44044802 | A          | G          | 41             | 39%      | L         | P         | -1              | FSCB           | rs3825630      | non-synonymous |
| chr14              | 44045261  | 44045261 | G          | A          | 38             | 53%      | P         | L         | -1              | FSCB           | rs45478391     | non-synonymous |
| chr14              | 44045356  | 44045356 | G          | T          | 48             | 58%      | H         | Q         | -1              | FSCB           | rs3809429      | non-synonymous |
| chr14              | 44715465  | 44715465 | A          | G          | 59             | 54%      | N         | S         | 1               | FANCM          | rs45604036     | non-synonymous |
| chr14              | 44735411  | 44735411 | A          | G          | 41             | 56%      | N         | S         | 1               | FANCM          | rs45557033     | non-synonymous |
| chr14              | 49162221  | 49162221 | T          | C          | 40             | 100%     | D         | G         | -1              | C14orf104      | rs9989177      | non-synonymous |
| chr14              | 49171432  | 49171432 | C          | G          | 4              | 100%     | E         | D         | -1              | C14orf104      | rs2985684      | non-synonymous |
| chr14              | 49368712  | 49368712 | T          | A          | 21             | 90%      | S         | C         | -1              | SDCCAG1        | rs3100906      | non-synonymous |
| chr14              | 49848566  | 49848566 | A          | C          | 9              | 56%      | L         | R         | -1              | L2HGDH         | rs2275591      | non-synonymous |
| chr14              | 49857963  | 49857963 | C          | T          | 39             | 38%      | P         | L         | 2               | ATP5S          | rs2275592      | non-synonymous |
| chr14              | 49868876  | 49868876 | G          | C          | 30             | 53%      | Q         | E         | -1              | CDKL1          | rs7161563      | non-synonymous |
| chr14              | 50293539  | 50293539 | C          | T          | 76             | 99%      | G         | E         | -3              | NIN            | rs2073347      | non-synonymous |
| chr14              | 50294124  | 50294124 | T          | G          | 37             | 100%     | Q         | P         | -3              | NIN            | rs12882191     | non-synonymous |
| chr14              | 50438360  | 50438360 | A          | G          | 30             | 40%      | I         | V         | 1               | ABHD12B        | rs28564871     | non-synonymous |
| chr14              | 50457532  | 50457532 | C          | T          | 18             | 56%      | V         | I         | -1              | PYGL           | rs946616       | non-synonymous |
| chr14              | 50515966  | 50515966 | T          | G          | 26             | 96%      | L         | F         | -3              | TRIM9          | rs2275462      | non-synonymous |
| chr14              | 51566137  | 51566137 | C          | A          | 21             | 100%     | G         | V         | -2              | NID2           | rs2273430      | non-synonymous |
| chr14              | 51577179  | 51577179 | A          | G          | 35             | 51%      | S         | P         | -2              | NID2           | rs3742536      | non-synonymous |
| chr14              | 51590118  | 51590118 | C          | T          | 15             | 60%      | G         | D         | -2              | NID2           | rs2101919      | non-synonymous |
| chr14              | 51590496  | 51590496 | G          | T          | 24             | 54%      | P         | H         | -3              | NID2           | rs35657569     | non-synonymous |
| chr14              | 54674688  | 54674688 | C          | A          | 16             | 44%      | P         | H         | 1               | LGALS3         | rs4644         | non-synonymous |
| chr14              | 54888270  | 54888270 | T          | A          | 52             | 48%      | I         | N         | 1               | FBXO34         | rs1045002      | non-synonymous |
| chr14              | 54888459  | 54888459 | T          | C          | 52             | 44%      | L         | P         | 1               | FBXO34         | rs3742569      | non-synonymous |
| chr14              | 54976925  | 54976925 | C          | G          | 7              | 100%     | R         | P         | -1              | TBPL2          | rs8019270      | non-synonymous |
| chr14              | 46683114  | 46683114 | G          | T          | 42             | 55%      | R         | R         | -2              | MDGA2          | n.A.           | synonymous     |
| chr14              | 41430383  | 41430383 | T          | C          | 85             | 56%      | S         | S         | 3               | LRFN5          | rs6572117      | synonymous     |
| chr14              | 49170136  | 49170136 | T          | C          | 13             | 100%     | T         | T         | -1              | C14orf104      | rs2985687      | synonymous     |
| chr14              | 49171120  | 49171120 | G          | A          | 6              | 100%     | A         | A         | -1              | C14orf104      | rs2985685      | synonymous     |
| chr14              | 49265429  | 49265429 | A          | G          | 31             | 100%     | T         | T         | 1               | KLHDC1         | rs4301946      | synonymous     |
| chr14              | 49321119  | 49321119 | A          | G          | 45             | 100%     | N         | N         | -1              | SDCCAG1        | rs10143621     | synonymous     |
| chr14              | 49686628  | 49686628 | G          | A          | 36             | 50%      | N         | N         | -2              | SOS2           | rs2229869      | synonymous     |
| chr14              | 49839467  | 49839467 | G          | A          | 36             | 39%      | I         | I         | -3              | L2HGDH         | rs2297995      | synonymous     |
| chr14              | 50124348  | 50124348 | A          | G          | 25             | 52%      | P         | P         | 2               | ATL1           | rs35014209     | synonymous     |
| chr14              | 50127477  | 50127477 | G          | A          | 36             | 100%     | E         | E         | 1               | ATL1           | rs1060197      | synonymous     |
| chr14              | 50262409  | 50262409 | G          | A          | 38             | 53%      | P         | P         | -1              | NIN            | rs1983764      | synonymous     |
| chr14              | 50274746  | 50274746 | C          | T          | 37             | 100%     | Q         | Q         | -1              | NIN            | rs111376       | synonymous     |
| chr14              | 50294408  | 50294408 | T          | A          | 45             | 44%      | S         | S         | -3              | NIN            | rs2073348      | synonymous     |
| chr14              | 50294882  | 50294882 | G          | T          | 42             | 57%      | A         | A         | -3              | NIN            | rs2073349      | synonymous     |
| chr14              | 50296750  | 50296750 | A          | G          | 21             | 57%      | H         | H         | -1              | NIN            | rs4901055      | synonymous     |
| chr14              | 50307451  | 50307451 | A          | G          | 36             | 33%      | V         | V         | -3              | NIN            | rs17793018     | synonymous     |
| chr14              | 50308817  | 50308817 | C          | G          | 28             | 100%     | L         | L         | -1              | NIN            | rs8020503      | synonymous     |
| chr14              | 50446524  | 50446524 | G          | A          | 25             | 68%      | T         | T         | -2              | PYGL           | rs2275465      | synonymous     |
| chr14              | 50453182  | 50453182 | G          | A          | 47             | 55%      | D         | D         | -1              | PYGL           | rs2075643      | synonymous     |
| chr14              | 51548065  | 51548065 | A          | G          | 50             | 44%      | A         | A         | -1              | NID2           | rs1051069      | synonymous     |
| chr14              | 51566025  | 51566025 | C          | A          | 21             | 52%      | R         | R         | -2              | NID2           | rs12887495     | synonymous     |
| chr14              | 51590603  | 51590603 | A          | G          | 29             | 100%     | Y         | Y         | -3              | NID2           | rs904059       | synonymous     |
| chr14              | 51975831  | 51975831 | T          | G          | 27             | 44%      | R         | R         | -3              | TXNDC16        | rs2249922      | synonymous     |
| chr14              | 51977103  | 51977103 | C          | T          | 45             | 51%      | Q         | Q         | -1              | TXNDC16        | rs1952254      | synonymous     |
| chr14              | 52415128  | 52415128 | G          | A          | 37             | 97%      | Y         | Y         | -1              | FERMT2         | rs2357947      | synonymous     |
| chr14              | 52599419  | 52599419 | A          | T          | 48             | 92%      | T         | T         | -1              | DDHD1          | rs4898778      | synonymous     |
| chr14              | 52689294  | 52689294 | G          | A          | 3              | 100%     | F         | F         | -1              | DDHD1          | rs2358189      | synonymous     |
| chr14              | 54689064  | 54689064 | A          | G          | 46             | 52%      | N         | N         | -3              | DLGAP5         | rs15870        | synonymous     |
| chr14              | 54887461  | 54887461 | T          | C          | 26             | 54%      | Y         | Y         | 1               | FBXO34         | rs10144418     | synonymous     |
| chr14              | 54933883  | 54933883 | A          | G          | 45             | 40%      | L         | L         | -3              | KIAA0831       | rs8003279      | synonymous     |

**Table S2. Table of high-confidence sequence variations observed for patient II/6-U.** Observed sequence variations (Var Nuc) are listed together with the reference nucleotide (Ref Nuc), number of reads at the respective position (Total Depth; min.>25%), observed variation frequency (Var Freq), resulting amino acid (AA) variation (Ref AA and Var AA), relevant gene annotation (Region/Gene Name, know SNP IDs, mutation type) and status after manual curation of read data.

| Primer         |    | Sequence                  |    |
|----------------|----|---------------------------|----|
| ATL1-Ex1fw     | 5′ | TCAGAGTCTGAGCGAACTGC      | 3′ |
| ATL1-Ex1rv     | 5′ | GTCTCCACAGAAGCAGAAAAGTG   | 3′ |
| ATL1-Ex2fw     | 5′ | TGCACCCAGCATAAAATGAG      | 3′ |
| ATL1-Ex2rv     | 5′ | CAGAGAAAATTGGTCTGTGTAGTTT | 3′ |
| ATL1-Ex3fw     | 5′ | TGAATTTCTCTGGTCTGCA       | 3′ |
| ATL1-Ex3rv     | 5′ | CAAAGATCATGCTATAGGATGCTA  | 3′ |
| ATL1_Ex4fw     | 5′ | GGCATTTCATGGCATGTGTAA     | 3′ |
| ATL1_Ex4rv     | 5′ | CACGAGAACTCGTATGCTAATTG   | 3′ |
| ATL1-ex5fw     | 5′ | ATTCCATCTCCAGAGCAGGT      | 3′ |
| ATL1-ex5Rv     | 5′ | GCTGTTCTCTGTTCTCGCTG      | 3′ |
| ATL1-Ex6fw     | 5′ | ACCTAGAGGGAAAAGTAAATGAAAG | 3′ |
| ATL1-Ex6rv     | 5′ | ATTTTGCCTGGAACCAGAAT      | 3′ |
| ATL1-Ex7fw     | 5′ | TGACATAGCTCCATTGAGGC      | 3′ |
| ATL1-Ex7rv     | 5′ | TTACACTGGCTTTGAAACCTCT    | 3′ |
| ATL1-Ex8fw     | 5′ | GTGGCTCCTACGAGTGCTTT      | 3′ |
| ATL1-Ex8rv     | 5′ | CACAGAGATAAGAAGGTGAGGGT   | 3′ |
| ATL1-Ex9fw     | 5′ | GGGCAAGGAGAATCATTAC       | 3′ |
| ATL1-Ex9rv     | 5′ | ACCTTTGCTCCCATATTATCG     | 3′ |
| ATL1-Ex10fw    | 5′ | TTTAAGAAGGGCCAGATTGG      | 3′ |
| ATL1-Ex10rv    | 5′ | AAGAGAATGAAAACCCTTTGGT    | 3′ |
| ATL1-Ex11fw    | 5′ | AATGTGAACTGCCTGTGGAA      | 3′ |
| ATL1-Ex11rv    | 5′ | GCCTTCAAAATTGTGCACAC      | 3′ |
| ATL1-Ex12,13fw | 5′ | ATAGGGGGTGGAAAGATGTG      | 3′ |
| ATL1-Ex12,13rv | 5′ | GGAAAATAGTTGTGTAGGACTTCAC | 3′ |
| ATL1-ex14fw    | 5′ | AACTGGATCCTCTGAGCCA       | 3′ |
| ATL1-ex14rv    | 5′ | CCCTGCTTAAAGTGGTATGTATTAC | 3′ |
| ATL1-Ex15fw    | 5′ | GGGCAAAGTAGAAGCTCACTG     | 3′ |
| ATL1-Ex15rv    | 5′ | CCAAACGTGGAATATCACATG     | 3′ |

**Table S3. Primer sequences.**
